# Supplementary material
Source: PubMed Central journal article supplement (PMC2930429)
Supplement: 1001562107_pnas.201001562SI.pdf [file 1001562107_pnas.201001562SI.pdf]

# Supporting Information

Bar-On et al. 10.1073/pnas.1001562107

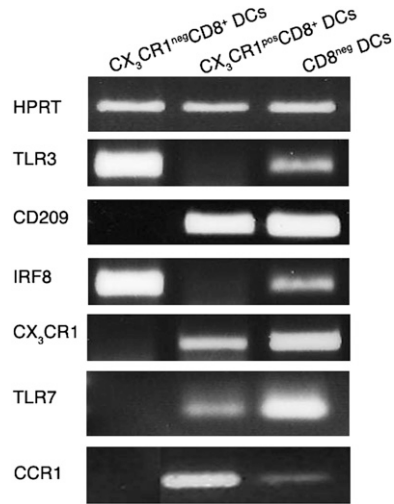

Fig. S1. Confirmative RT-PCR analysis for expression of selected genes by splenic dendritic cell (DC) populations sorted from spleens of  $Cx_3cr1^{gfp/+}$  mice.

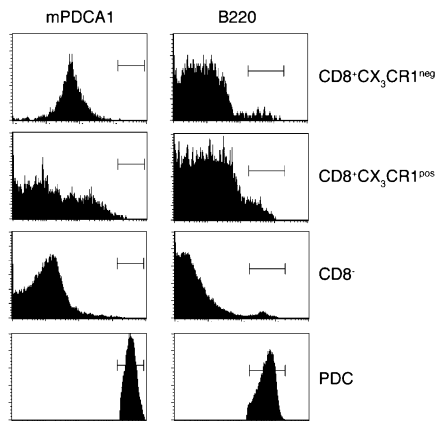

Fig. S2. Flow cytometric analysis of  $CX_3CR1^-CD8^+$  classical DC (cDC),  $CX_3CR1^+CD8^+$  DC,  $CD8^-$  cDC, and plasmacytoid DC (PDC) of  $Cx_3cr1^{gfp/+}$  mice for surface expression of PDC surface markers (BST-2, B220).

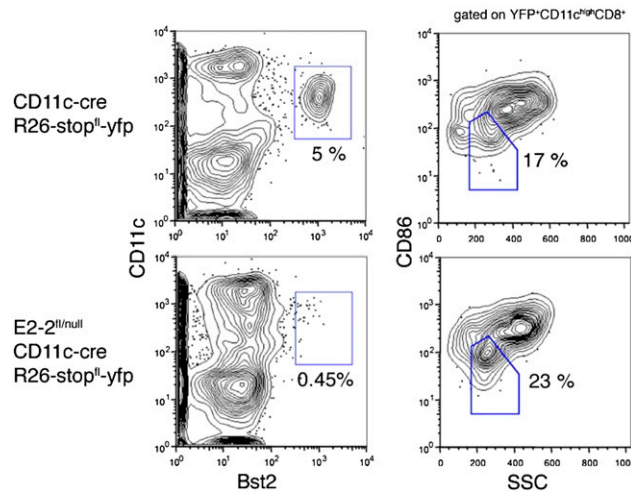

**Fig. S3.** Persistence of CX<sub>3</sub>CR1<sup>+</sup> CD8α<sup>+</sup> DC in the absence of the transcription factor E2-2. (Left) Splenocytes from CD11c-Cre<sup>+</sup>, R26-EYFP<sup>+</sup> E2-2 conditional or control E2-2 WT mice were analyzed for the presence of CD11c<sup>int</sup> Bst2<sup>+</sup> PDC. (Right) Gated B220<sup>-</sup> CD11c<sup>hi</sup> CD8α<sup>+</sup> DC comprise the CD86<sup>lo</sup> SSC<sup>lo</sup> and the CD86<sup>hi</sup> SSC<sup>hi</sup> subsets (corresponding to CX<sub>3</sub>CR1<sup>+</sup> and CX<sub>3</sub>CR1<sup>-</sup> populations, respectively). Data are representative of three independent experiments.

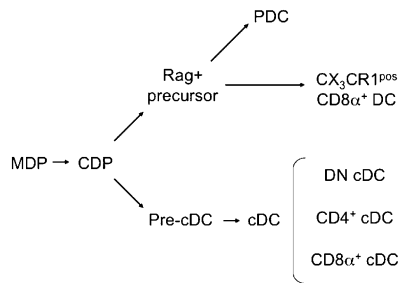

**Fig. S4.** Schematic showing the presumed origin of CX<sub>3</sub>CR1<sup>+</sup> CD8α<sup>+</sup> DC. DN, double negative. MDP, macrophage dendritic cell precursors; CDP, common DC precursors.

**Table S1. Genes expressed equally among splenic DC subsets**

| Gene          | AFFY_ID      | CX <sub>3</sub> CR1 <sup>+</sup> CD8 | CX <sub>3</sub> CR1 <sup>-</sup> CD8 | CD4  | Double negative |
|---------------|--------------|--------------------------------------|--------------------------------------|------|-----------------|
| <i>CD11c</i>  | 1419128_at   | 4399                                 | 3271                                 | 6415 | 4042            |
| <i>H2-Ab1</i> | 1451721_a_at | 8151                                 | 9210                                 | 9581 | 8703            |
| <i>CD80</i>   | 1451950_a_at | 213                                  | 183                                  | 160  | 165             |
| <i>Flt3</i>   | 1419538_at   | 3749                                 | 2580                                 | 1717 | 1477            |
| <i>CD40</i>   | 1449473_s_at | 820                                  | 500                                  | 949  | 695             |
| <i>Stat3</i>  | 1460700_at   | 983                                  | 542                                  | 735  | 660             |

**Table S2. Genes expressed by CX<sub>3</sub>CR1<sup>+</sup> and cCX<sub>3</sub>CR1<sup>-</sup> CD8α<sup>+</sup> DC**

| Gene           | AFFY_ID    | CX <sub>3</sub> CR1 <sup>+</sup> CD8 | CX <sub>3</sub> CR1 <sup>-</sup> CD8 | CD4   | Double negative |
|----------------|------------|--------------------------------------|--------------------------------------|-------|-----------------|
| <i>CD8</i>     | 1444078_at | 1572                                 | 1942                                 | —     | —               |
| <i>Sca1</i>    | 1417185_at | 1870.2                               | 1180.2                               | 646.2 | 406.7           |
| <i>CD24a</i>   | 1416034_at | 509                                  | 966                                  | —     | 283             |
| <i>Hspe1</i>   | 1422579_at | 119.7                                | 193.7                                | —     | —               |
| <i>Nfe2l3</i>  | 1417520_at | 177.4                                | 110.6                                | —     | —               |
| <i>Laf4</i>    | 1430435_at | 157.8                                | 121.3                                | 5.1   | 8.6             |
| <i>Bcl2l14</i> | 1429347_at | 249.4                                | 205.5                                | —     | —               |

**Table S3. Genes highly expressed by cCX<sub>3</sub>CR1<sup>-</sup> CD8 $\alpha$ <sup>+</sup> DC but low or absent from CX<sub>3</sub>CR1<sup>+</sup> CD8 $\alpha$ <sup>+</sup> DC**

| Gene            | AFFY_ID      | CX <sub>3</sub> CR1 <sup>pos</sup> | CX <sub>3</sub> CR1 <sup>neg</sup> | CD4   | Double negative | Gene type            |
|-----------------|--------------|------------------------------------|------------------------------------|-------|-----------------|----------------------|
| <i>IRF8</i>     | 1416714_at   | 1408                               | 13284                              | 616   | 4847            | Transcription factor |
| <i>Id2</i>      | 1422537_a_at | 55                                 | 1161                               | 354   | 481             |                      |
| <i>Notch4</i>   | 1449146_at   | —                                  | 545                                | —     | —               |                      |
| <i>Tlr3</i>     | 1422782_s_at | 98                                 | 1337                               | —     | 214             | Toll-like receptor   |
| <i>Tlr12</i>    | 1438329_at   | —                                  | 196                                | —     | —               |                      |
| <i>DEC205</i>   | 1449328_at   | —                                  | 135                                | —     | —               | Membrane protein     |
| <i>CD103</i>    | 1449216_at   | —                                  | 1130                               | —     | —               |                      |
| <i>Langerin</i> | 1425243_at   | —                                  | 724                                | —     | —               |                      |
| <i>CD36</i>     | 1450883_a_at | 57                                 | 1454                               | —     | 165             |                      |
| <i>IL12p40</i>  | 1449497_at   | —                                  | 165                                | —     | —               | Cytokine             |
| <i>IL15</i>     | 1418219_at   | —                                  | 191                                | —     | —               |                      |
| <i>CD86</i>     | 1420404_at   | 312                                | 3099                               | 811   | 1071            | Costimulation        |
| <i>CD81</i>     | 1416330_at   | 786                                | 4819                               | 1712  | 587             |                      |
| <i>XCR1</i>     | 1422294_at   | —                                  | 519                                | —     | —               | Chemokine            |
| <i>Cxcl9</i>    | 1418652_at   | 506.2                              | 4429.6                             | 447.2 | 800.4           |                      |
| <i>Cxcr3</i>    | 1449925_at   | 121.9                              | 1819                               | 229.4 | 311.4           |                      |
| <i>Cyst C</i>   | 1426195_a_at | 3459                               | 12870                              | 3533  | 5790            | Other                |
| <i>CD1d1</i>    | 1449130_at   | 382                                | 1506                               | 515   | 552             |                      |
| <i>Ppt1</i>     | 1422468_at   | 302                                | 5708                               | 326   | 921             |                      |

**Table S4. Genes expressed in CX<sub>3</sub>CR1<sup>+</sup> CD8 $\alpha$ <sup>+</sup> DC and cCD8 $\alpha$ <sup>-</sup> DC**

| Gene              | AFFY_ID      | CX <sub>3</sub> CR1 <sup>pos</sup> | CX <sub>3</sub> CR1 <sup>neg</sup> | CD4    | Double negative | Gene type            |
|-------------------|--------------|------------------------------------|------------------------------------|--------|-----------------|----------------------|
| <i>Irf4</i>       | 1421173_at   | 880                                | —                                  | 304    | 407             | Transcription factor |
| <i>Relb</i>       | 1417856_at   | 2264                               | 630                                | 3119   | 1782            |                      |
| <i>Sirpb</i>      | 1458683_at   | 1223                               | —                                  | 3468   | 2382            |                      |
| <i>Stat4</i>      | 1448713_at   | 882                                | —                                  | 593    | 612             |                      |
| <i>Tlr1</i>       | 1449049_at   | 745                                | 75                                 | 1165   | 991             | Toll-like receptor   |
| <i>Tlr5</i>       | 1450242_at   | 261                                | —                                  | 338    | 85              |                      |
| <i>Tlr7</i>       | 1422010_at   | 184                                | —                                  | 452    | 146             |                      |
| <i>CD209a</i>     | 1426172_a_at | 995                                | —                                  | 651    | 768             | Lectin               |
| <i>DCIR</i>       | 1425407_s_at | 1173.4                             | —                                  | 1054.8 | 1560.6          |                      |
| <i>DCIR3</i>      | 1429954_at   | 853                                | 34                                 | 1446   | 967             |                      |
| <i>Clecsf6</i>    | 1425407_s_at | 1173                               | —                                  | 1054   | 1560            |                      |
| <i>Clecsf12</i>   | 1420699_at   | 4128                               | 406                                | 4425   | 3240            |                      |
| <i>Clecsf10</i>   | 1419627_s_at | 348                                | —                                  | 868    | 287             |                      |
| <i>CCR2</i>       | 1421186_at   | 705                                | 225                                | 142    | 539             | Chemokine receptor   |
| <i>CCR6</i>       | 1450357_at   | 342                                | 55                                 | 1094   | 957             |                      |
| <i>CCL3</i>       | 1419561_at   | 55.6                               | —                                  | 200    | 163             |                      |
| <i>CD115</i>      | 1419873_s_at | 3086                               | 90                                 | 3336   | 2071            | Other                |
| <i>F4I80</i>      | 1451161_a_at | 578                                | 143.1                              | 3068   | 1692            |                      |
| <i>F4I80-like</i> | 1451563_at   | 223                                | —                                  | 444.8  | 521             |                      |
| <i>CD71</i>       | 1452661_at   | 1327.4                             | 408.7                              | 1452.6 | 1448.5          |                      |
| <i>Plxnb2</i>     | 1416683_at   | 1402.5                             | 218                                | 1009.9 | 776.2           |                      |
| <i>Ltb</i>        | 1419135_at   | 2146.3                             | —                                  | 1567.7 | 1112.3          |                      |
| <i>Ifitm3</i>     | 1423754_at   | 3752.7                             | 436.8                              | 4934.5 | 3893.3          |                      |
| <i>Bcl3</i>       | 1418133_at   | 1264                               | 146                                | 674    | 655             |                      |
| <i>S100a4</i>     | 1424542_at   | 8947.1                             | —                                  | 7229.6 | 7578            | Calcium binding      |
| <i>S100a6</i>     | 1421375_a_at | 1873.5                             | 139.7                              | 1217   | 1359.8          |                      |
| <i>Cyp4f16</i>    | 1417277_at   | 2466.3                             | 241.2                              | 3064   | 2479.9          | Cytochrome           |
| <i>Cybb</i>       | 1436778_at   | 4727.8                             | 107.7                              | 3569.2 | 3064.2          |                      |

**Table S5. Genes expressed by PDC and CX<sub>3</sub>CR1<sup>+</sup> CD8 $\alpha$ <sup>+</sup> DC as compared with cDC**

| Gene           | AFFY_ID      | CX <sub>3</sub> CR1 <sup>pos</sup> | CX <sub>3</sub> CR1 <sup>neg</sup> | CD4 | Double negative |
|----------------|--------------|------------------------------------|------------------------------------|-----|-----------------|
| <i>E2-2</i>    | 1416723_at   | 2178                               | 126                                | 388 | 462             |
| <i>Ly-49Q</i>  | 1425888_at   | 1519                               | 52                                 | 155 | 311             |
| <i>Ly6c</i>    | 1421571_a_at | 1929                               | 168                                | 200 | 587             |
| <i>Spib</i>    | 1460407_at   | 1577                               | 60                                 | 577 | 704             |
| <i>CD209d</i>  | 1426183_a_at | 1336                               | —                                  | —   | 179             |
| <i>CD209e</i>  | 1420582_at   | 950                                | —                                  | —   | 187             |
| <i>Cyp7b1</i>  | 1421074_at   | 838                                | —                                  | —   | 28              |
| <i>Lefty1</i>  | 1417638_at   | 503                                | —                                  | —   | —               |
| <i>Ptprf</i>   | 1420843_at   | 378                                | —                                  | —   | —               |
| <i>Blnk</i>    | 1451780_at   | 334                                | —                                  | —   | 78              |
| <i>CD62L</i>   | 1419480_at   | 1040                               | 313                                | 99  | 292             |
| <i>Ccr1</i>    | 1419609_at   | 274                                | —                                  | —   | 52              |
| <i>Siglech</i> | 1457786_at   | 114                                | —                                  | 71  | 56              |
| <i>Bst2</i>    | 1424921_at   | 660                                | 235                                | 90  | 232             |
| <i>Il7r</i>    | 1448575_at   | 559                                | 106                                | 228 | 259             |
| <i>Kdr</i>     | 1449379_at   | 717                                | —                                  | —   | 94              |
| <i>Runx2</i>   | 1424704_at   | 419                                | —                                  | 79  | 142             |
| <i>Atp1b1</i>  | 1451152_a_at | 206                                | —                                  | —   | 68              |
| <i>Snag1</i>   | 1416359_at   | 1071                               | 164                                | 250 | 189             |
| <i>Hpse</i>    | 1433930_at   | 1787                               | 232                                | 468 | 452             |
| <i>Igk-C</i>   | 1427455_x_at | 935                                | 248                                | 252 | 185             |

**Table S6. Genes silent in PDC and CX<sub>3</sub>CR1<sup>+</sup> CD8 $\alpha$ <sup>+</sup> DC as compared with cDC**

| Gene           | AFFY_ID      | CX <sub>3</sub> CR1 <sup>+</sup> CD8 | CX <sub>3</sub> CR1 <sup>-</sup> CD8 | CD4  | Double negative |
|----------------|--------------|--------------------------------------|--------------------------------------|------|-----------------|
| <i>Id2</i>     | 1422537_a_at | 55                                   | 1161                                 | 354  | 481             |
| <i>CCR7</i>    | 1423466_at   | 359                                  | 983                                  | 844  | 1015            |
| <i>Tgfb1</i>   | 1448123_s_at | 2276                                 | 5753                                 | 7043 | 4501            |
| <i>Adam8</i>   | 1416871_at   | 128                                  | 2548                                 | 856  | 875             |
| <i>Fgl2</i>    | 1421855_at   | 64                                   | 419                                  | 205  | 313             |
| <i>Apob48r</i> | 1420382_at   | 450                                  | 1907                                 | 1284 | 1396            |
| <i>Atf3</i>    | 1449363_at   | 158                                  | 461                                  | 428  | 516             |
| <i>Nr4a2</i>   | 1455034_at   | 32                                   | 344                                  | 138  | 372             |
| <i>CD81</i>    | 1416330_at   | 786                                  | 4820                                 | 1713 | 588             |
